# Supplementary material for: A Research on the Sharing Platform of Wild Bird Data in Yunnan Province Based on Blockchain and Interstellar File System
Source: MDPI journal article supplement (doi:10.3390/s22186961), 2022-09-14
Supplement: s1 [file s1]

# Interface documentation for an open platform for bird data based on a blockchain and the IPFS

|                                                                  |    |
|------------------------------------------------------------------|----|
| 1 Document Introduction .....                                    | 3  |
| 1.1 Special Announcement .....                                   | 3  |
| 1.2 Reading Object .....                                         | 3  |
| 1.3 Product description .....                                    | 3  |
| 1.4 Explanation of term .....                                    | 4  |
| 1.5 nterface tool test .....                                     | 4  |
| 2 Usage process.....                                             | 4  |
| 3 Interface List .....                                           | 5  |
| 3.1.1 <i>Search documents by address</i> .....                   | 5  |
| 3.1.2 <i>Storage files</i> .....                                 | 7  |
| 3.1.3 <i>Update files</i> .....                                  | 9  |
| 3.1.4 <i>Get information about users on the blockchain</i> ..... | 11 |
| 3.1.5 <i>Query Node Status</i> .....                             | 13 |
| 3.1.6 <i>Register Account</i> .....                              | 15 |
| 3.1.7 <i>Configure blockchain property files</i> .....           | 17 |

# **1 Document Introduction**

## **1.1 Special Announcement**

No part of this document may be reproduced or transmitted for any purpose, in any form or by any means, including, but not limited to, mechanical or electronic, without the written permission of a member of the project team. The members of the project team own patents (or have patent applications pending), trademarks, copyrights, or other intellectual property rights in the technology and products covered by this document. This document does not grant a license to these patents, trademarks, copyrights, or other intellectual property rights unless a written license agreement is obtained from a member of the project team.

Any names, company names, and data used in this document for product functionality examples and descriptions are fictitious and are for internal testing purposes only by the project team.

## **1.2 Reading Object**

Development, maintenance, and management staff in the technical department should have a basic knowledge of

1. An understanding of HTTPS/HTTP protocols etc.
2. Understand the basic concepts of information security.
3. Knowledge of at least one programming language for computers.

## **1.3 Product description**

This development manual provides a detailed description of the system's functional interfaces. This guide will provide a comprehensive understanding of the system and enable technical staff to master the system's interfaces as quickly as possible and to be able to develop the system.

## 1.4 Explanation of term

| Abbreviations of nouns | Definition of the noun                             |
|------------------------|----------------------------------------------------|
| Client side            | The client in this document is the ApiPost client. |
| Server-side            | The server side in this document is the user side. |
| Environment variables  | Dynamic KV parameters in this system.              |

## 1.5 nterface tool test

1. Test tools recommended ApiPost interface test tool. Official address:

<https://www.apipost.cn>

2. The ApiPost test tool is used as follows.

- ①. Enter the gateway address or interface address into the url correctly.
  - ②. Fill in all the parameters in the order from top to bottom according to the following directory and interface definition.
  - ③. Write the global parameters of the directory or script correctly.
  - ④. Fill in the parameters of the interface and the content of the custom script in the corresponding positions.
3. The custom script supports data collocation with request message encryption.

## 2 Usage process

1. Preparation phase.

A. Requesting information such as test numbers.

B. Obtaining information such as a development manual (this document).

2. Development phase.

A. quickly become familiar with the docking interface according to the DEMO provided in conjunction with the development documentation.

B. Develop their system according to the interfaces provided by this system to achieve the required business functions.

C. Conduct comprehensive testing of the business functions of their system.

D. Intermodulation with the test environment.

3. Production use.

A. Use the official information provided by the system.

## 3 Interface List

### 3.1.1 Search documents by address

Interface Status: Completed

Interface URL: <http://domain/open/ipfs/v1/getDocumentByAddress>

Content-Type: application/json

Request Method: get

Header parameters and description

| Parameter Name | Example values                   | Parameter Type | Required or not | Parameter Description |
|----------------|----------------------------------|----------------|-----------------|-----------------------|
| accessToken    | OfepC2Atn9ZWEgU2bqBJ6rFqDtTrGv2V | String         | Yes             |                       |
| expiredTime    | 7200                             | Number         | Yes             |                       |

Field Description

| Parameter Name | Example values                   | Parameter Type | Required or not | Parameter Description |
|----------------|----------------------------------|----------------|-----------------|-----------------------|
| ipfs_id        | EvqKdgbm0esJ1sMB                 | String         | Yes             | ipfs_id               |
| address_id     | h5witQJeo6IQwz1qU6DNufUrBGmGW21u | String         | Yes             | address_id            |
| space_id       | F7Uo3dbKyUUp8f3                  | String         | Yes             | space_id              |

|                            |                   |         |     |                            |
|----------------------------|-------------------|---------|-----|----------------------------|
|                            | EPU45hNvVsTFQwKjC |         |     |                            |
| doucument_type             | detail            | String  | Yes | doucument_type             |
| doucument_temp_url_address | false             | Boolean | Yes | doucument_temp_url_address |

#### Body parameters and description

```
{
  "ipfs_id" : "EvqKdgbm0esJ1sMB",
  "address_id" : "h5witQJeo6lQwz1qU6DNufUrBGmGW21u",
  "space_id" : "F7Uo3dbKyUUp8f3EPU45hNvVsTFQwKjC",
  "doucument_type" : "detail",
  "doucument_temp_url_address" : "false"
}
```

#### Field Description

| Parameter Name                   | Example values                                                                   | Parameter Type | Parameter Description            |
|----------------------------------|----------------------------------------------------------------------------------|----------------|----------------------------------|
| error_code                       | 0                                                                                | String         | error_code                       |
| error_message                    | Success                                                                          | String         | error_message                    |
| result                           |                                                                                  | Object         | result                           |
| result.address_id                | h5witQJeo6lQwz1qU6DNufUrBGmGW21u                                                 | String         | result.address_id                |
| result.document_detail           |                                                                                  | Object         | result.document_detail           |
| result.document_detail.name      | **** profile                                                                     | String         | result.document_detail.name      |
| result.document_detail.type      | json                                                                             | String         | result.document_detail.type      |
| result.document_detail.size      | 7300                                                                             | Number         | result.document_detail.size      |
| result.document_temp_url_address | http://domain/open/ipfs/v1/tempUrl?id=iHbaqgLnZrGxFITvBE2g7XvAWieWFYZM&expiredTi | String         | result.document_temp_url_address |

|  |                                                      |  |  |
|--|------------------------------------------------------|--|--|
|  | me=7200&accessToken=OfepC2Atn9ZWEgU2bqbJ6rFqDtTrGv2V |  |  |
|--|------------------------------------------------------|--|--|

Example response

```
{
  "error_code" : "0",
  "error_message" : "Success",
  "result" {
    "address_id" : "h5witQJeo6lQwz1qU6DNufUrBGmGW21u",
    "document_detail" : {
      "name" : "***** profile",
      "type" : "json",
      "size" : 7300
    },
    "document_temp_url_address" : "http://domain/open/ipfs/v1/tempUrl?id=iHbaqgLnZrGxFITvBE2g7XvAWieWFYZM&expiredTime=7200&accessToken=OfepC2Atn9ZWEgU2bqbJ6rFqDtTrGv2V",
  }
}
```

### 3.1.2 Storage files

Interface Status: Completed

Interface URL: <http://domain/open/ipfs/v1/insertDocument>

Content-Type: application/json

Request Method: post

Header parameters and description

| Parameter Name | Example values                   | Parameter Type | Required or not | Parameter Description |
|----------------|----------------------------------|----------------|-----------------|-----------------------|
| accessToken    | yhd3c9WqNwSKtP3XRQuJZm11OMxtYahN | String         | Yes             |                       |

|             |      |        |     |  |
|-------------|------|--------|-----|--|
| expiredTime | 7200 | Number | Yes |  |
|-------------|------|--------|-----|--|

#### Field Description

| Parameter Name | Example values                   | Parameter Type | Required or not | Parameter Description |
|----------------|----------------------------------|----------------|-----------------|-----------------------|
| ipfs_id        | EvqKdgbm0esJ1sMB                 | String         | Yes             | ipfs_id               |
| address_id     | itvqsYwXfNqWNfmrPe0I2x5HrOJuv6e7 | String         | Yes             | address_id            |
| space_id       | F7Uo3dbKyUUp8f3EPU45hNvVsTFQwKjC | String         | Yes             | space_id              |

#### Body parameters and description

```
{
  "ipfs_id" : "EvqKdgbm0esJ1sMB",
  "address_id" : "itvqsYwXfNqWNfmrPe0I2x5HrOJuv6e7",
  "space_id" : "F7Uo3dbKyUUp8f3EPU45hNvVsTFQwKjC",
}
```

#### Field Description

| Parameter Name             | Example values                   | Parameter Type | Parameter Description       |
|----------------------------|----------------------------------|----------------|-----------------------------|
| error_code                 | 0                                | String         | error_code                  |
| error_message              | Success                          | String         | error_message               |
| address_id                 | itvqsYwXfNqWNfmrPe0I2x5HrOJuv6e7 | String         | address_id                  |
| result                     |                                  | Object         | result                      |
| result.address_id          | h5witQJeo6IQwz1qU6DNufUrBGmGW21u | String         | result.address_id           |
| result.storage_detail      |                                  | Object         |                             |
| result.storage_detail.name | Storage files                    | String         | result.document_detail.name |
| result.storage_detail.type | json                             | String         | result.document_detail.type |
| result.storage_detail.     | 7300                             | Number         | result.document_det         |



| size                            |                                                                                                                                      |        | ail.size                        |
|---------------------------------|--------------------------------------------------------------------------------------------------------------------------------------|--------|---------------------------------|
| result.Storage_temp_url_address | http://domain/open/ipfs/v1/tempUrl?id=iHbaqgLnZrGxFITvBE2g7XvAWieWFYZM&expiredTime=7200&accessToken=yhd3c9WqNwSKtP3XRQuJZm11OMxtYahN | String | result.Storage_temp_url_address |

Example response

```
{
  "error_code" : "0",
  "error_message" : "Success",
  "address_id" : "itvqsYwXfNqWNfmrPe0I2x5HrOJuv6e7",
  "result" : {
    "address_id" : "h5witQJeo6IQwz1qU6DNufUrBGmGW21u",
    "storage_detail" : {
      "name" : "Storage files",
      "type" : "json",
      "size" : 7300
    },
    "Storage_temp_url_address" : "http://domain/open/ipfs/v1/tempUrl?id=iHbaqgLnZrGxFITvBE2g7XvAWieWFYZM&expiredTime=7200&accessToken=yhd3c9WqNwSKtP3XRQuJZm11OMxtYahN",
  }
}
```

### 3.1.3 Update files

Interface Status: Completed

Interface URL: http://domain/open/ipfs/v1/updateDocument

Content-Type: application/json

Request Method: post

Header parameters and description

| Parameter Name | Example values                       | Parameter Type | Required or not | Parameter Description |
|----------------|--------------------------------------|----------------|-----------------|-----------------------|
| accessToken    | Ldlb1VA3iazOfT2E2<br>HiGoKs9NiOrR2Y8 | String         | Yes             |                       |
| expiredTime    | 7200                                 | Number         | Yes             |                       |

#### Field Description

| Parameter Name | Example values                   | Parameter Type | Required or not | Parameter Description |
|----------------|----------------------------------|----------------|-----------------|-----------------------|
| ipfs_id        | EvqKdgbm0esJ1sMB                 | String         | Yes             | ipfs_id               |
| address_id     | EzZgzRcHVzHizkiaEDkJEp7PHiPrIZ6j | String         | Yes             | address_id            |
| space_id       | eTEVraiauxJwafqRaZnBxXvn75gYoHYD | String         | Yes             | space_id              |
| update_type    | detail                           | String         | Yes             | update_type           |

#### Body parameters and description

```
{
  "ipfs_id" : "EvqKdgbm0esJ1sMB",
  "address_id" : "EzZgzRcHVzHizkiaEDkJEp7PHiPrIZ6j",
  "space_id" : "eTEVraiauxJwafqRaZnBxXvn75gYoHYD",
  "update_type" : "detail",
}
```

#### Field Description

| Parameter Name            | Example values                   | Parameter Type | Parameter Description     |
|---------------------------|----------------------------------|----------------|---------------------------|
| error_code                | 0                                | String         | error_code                |
| error_message             | Success                          | String         | error_message             |
| result                    |                                  | Object         | result                    |
| result.address_id         | EzZgzRcHVzHizkiaEDkJEp7PHiPrIZ6j | String         | result.address_id         |
| result.update_detail      |                                  | Object         | result.update_detail      |
| result.update_detail.name | Update files                     | String         | result.update_detail.name |

|                                |                                                                                                                                      |        |                                |
|--------------------------------|--------------------------------------------------------------------------------------------------------------------------------------|--------|--------------------------------|
| result.update_detail.type      | json                                                                                                                                 | String | result.update_detail.type      |
| result.update_detail.size      | 7300                                                                                                                                 | Number | result.update_detail.size      |
| result.update_temp_url_address | http://domain/open/ipfs/v1/tempUrl?id=5sRcFibJRa58HbJK2IcuZaLecJuLPfU4&expiredTime=7200&accessToken=Ldlb1VA3iazOfT2E2HiGoKs9NiOrR2Y8 | String | result.update_temp_url_address |

Example response

```
{
  "error_code" : "0",
  "error_message" : "Success",
  "result" : {
    "address_id" : "EzZgzRcHVzHizkiaEDkJEp7PHiPrIZ6j",
    "update_detail" : {
      "name" : "Update files",
      "type" : "json",
      "size" : 7300
    },
    "update_temp_url_address" : "http://domain/open/ipfs/v1/tempUrl?id=5sRcFibJRa58HbJK2IcuZaLecJuLPfU4&expiredTime=7200&accessToken=Ldlb1VA3iazOfT2E2HiGoKs9NiOrR2Y8",
  }
}
```

#### 3.1.4 Get information about users on the blockchain

Interface Status: Completed

Interface URL: <http://domain/open/bigchaindb/v1/getIndividualDetail>

Content-Type: application/json

Request Method: get

Header parameters and description

| Parameter Name | Example values                   | Parameter Type | Required or not | Parameter Description |
|----------------|----------------------------------|----------------|-----------------|-----------------------|
| accessToken    | DPGNfH865I2wGDxmZcEypyHnsJKZm0bU | String         | Yes             |                       |
| expiredTime    | 7200                             | Number         | Yes             |                       |

#### Field Description

| Parameter Name | Example values                   | Parameter Type | Required or not | Parameter Description |
|----------------|----------------------------------|----------------|-----------------|-----------------------|
| ipfs_id        | EvqKdgbm0esJ1sMB                 | String         | Yes             | ipfs_id               |
| address_id     | EzZgzRcHVzHizkiaEDkJEp7PHiPrIZ6j | String         | Yes             | address_id            |
| space_id       | eTEVraiauxJwafqRaZnBxXvn75gYoHYD | String         | Yes             | space_id              |
| update_type    | detail                           | String         | Yes             | update_type           |

#### Body parameters and description

```
{
  "bigchaindb_id" : "LvHhnB8TxfE1IRJQ",
  "space_id" : "cmkIYIshvdkbGHNgFXrRADLndMYNtSpo",
}
```

#### Field Description

| Parameter Name            | Example values                   | Parameter Type | Parameter Description     |
|---------------------------|----------------------------------|----------------|---------------------------|
| error_code                | 0                                | String         | error_code                |
| error_message             | Success                          | String         | error_message             |
| result                    |                                  | Object         | result                    |
| result.address_id         | EzZgzRcHVzHizkiaEDkJEp7PHiPrIZ6j | String         | result.address_id         |
| result.update_detail      |                                  | Object         | result.update_detail      |
| result.update_detail.name | Update files                     | String         | result.update_detail.name |
| result.update_detail.t    | json                             | String         | result.update_detail.t    |

|                                |                                                                                                                                      |        |                                |
|--------------------------------|--------------------------------------------------------------------------------------------------------------------------------------|--------|--------------------------------|
| ype                            |                                                                                                                                      |        | ype                            |
| result.update_detail.size      | 7300                                                                                                                                 | Number | result.update_detail.size      |
| result.update_temp_url_address | http://domain/open/ipfs/v1/tempUrl?id=5sRcFibJRa58HbJK2IcuZaLecJuLPfU4&expiredTime=7200&accessToken=Ldlb1VA3iazOfT2E2HiGoKs9NiOrR2Y8 | String | result.update_temp_url_address |

Example response

```
{
  "error_code" : "0",
  "error_message" : "Success",
  "result" : {
    "bigchaindb_id" : "LvHhnB8TxfE1IRJQ",
    "user_information" : {
      "name" : "****",
      "school" : "*****",
      "account_number" : "*****",
      "captchaOnOff" : "true",
      "uuid" : "m0o6qivkt9yscmu2ycphvn3s65y8pfyh"
    },
  },
}
```

### 3.1.5 Query Node Status

Interface Status: Completed

Interface URL: http://domain/open/bigchaindb/v1/getPeerStatus

Content-Type: application/json

Request Method: get

Header parameters and description

| Parameter Name | Example values   | Parameter Type | Required or not | Parameter Description |
|----------------|------------------|----------------|-----------------|-----------------------|
| accessToken    | UKhc57gSx82VQecz | String         | Yes             |                       |

|             |                  |        |     |  |
|-------------|------------------|--------|-----|--|
|             | h5NGTjpwCzOcYwoj |        |     |  |
| expiredTime | 7200             | Number | Yes |  |

#### Field Description

| Parameter Name | Example values   | Parameter Type | Required or not | Parameter Description |
|----------------|------------------|----------------|-----------------|-----------------------|
| peer_id        | Xgfgc8HfDp7rMKHU | String         | Yes             | peer_id               |

#### Body parameters and description

```
{
  "peer_id" : "Xgfgc8HfDp7rMKHU",
}
```

#### Field Description

| Parameter Name                 | Example values                                                                                                                       | Parameter Type | Parameter Description          |
|--------------------------------|--------------------------------------------------------------------------------------------------------------------------------------|----------------|--------------------------------|
| error_code                     | 0                                                                                                                                    | String         | error_code                     |
| error_message                  | Success                                                                                                                              | String         | error_message                  |
| result                         |                                                                                                                                      | Object         | result                         |
| result.address_id              | EzZgzRcHVzHizkiaEDkJEp7PHiPrIZ6j                                                                                                     | String         | result.address_id              |
| result.update_detail           |                                                                                                                                      | Object         | result.update_detail           |
| result.update_detail.name      | Update files                                                                                                                         | String         | result.update_detail.name      |
| result.update_detail.type      | json                                                                                                                                 | String         | result.update_detail.type      |
| result.update_detail.size      | 7300                                                                                                                                 | Number         | result.update_detail.size      |
| result.update_temp_url_address | http://domain/open/ipfs/v1/tempUrl?id=5sRcFibJRa58HbJK2IcuZaLecJuLPfU4&expiredTime=7200&accessToken=Ldlb1VA3iazOfT2E2HiGoKs9NiOrR2Y8 | String         | result.update_temp_url_address |

#### Example response

```

{
  "error_code" : "0",
  "error_message" : "Success",
  "result" : {
    "request_id" : "EzZgzRcHVzHizkiaEDkJEp7PHiPrIZ6j",
    "update_detail" : {
      "node_name" : "Update files",
      "node_state" : "Normal",
    },
  }
}

```

### 3.1.6 Register Account

Interface Status: Completed

Interface URL: <http://domain/open/bigchaindb/v1/registerIndividualAccount>

Content-Type: *application/json*

Request Method: *post*

Header parameters and description

| Parameter Name | Example values                   | Parameter Type | Required or not | Parameter Description |
|----------------|----------------------------------|----------------|-----------------|-----------------------|
| accessToken    | YysRrnssVrq0u1U0qORCPSPZVxICqItc | String         | Yes             |                       |
| expiredTime    | 7200                             | Number         | Yes             |                       |

Field Description

| Parameter Name | Example values | Parameter Type | Required or not | Parameter Description       |
|----------------|----------------|----------------|-----------------|-----------------------------|
| name           | ***            | String         | Yes             | result.document_detail.name |
| password       | cWusTDiC       | String         | Yes             | password                    |

Body parameters and description

```
{
  "name": "***",
  "password": "cWusTDiC"
}
```

#### Field Description

| Parameter Name | Example values              | Parameter Type | Parameter Description       |
|----------------|-----------------------------|----------------|-----------------------------|
| error_code     | 0                           | String         | error_code                  |
| error_message  | Success                     | String         | error_message               |
| user           |                             | Object         | user                        |
| user.gender    | male                        | String         | user.gender                 |
| user.avatar    | /uploads/default_avatar.png | String         | user.avatar                 |
| user.following | {}                          | Object         | user.following              |
| user._id       | 5f7c5127354939e9ce5465a2    | String         | user._id                    |
| user.name      | ***                         | String         | result.document_detail.name |
| user.password  | cWusTDiC                    | String         | user.password               |
| user.createdAt | 2022-7-06T11:12:39.664Z     | String         | user.createdAt              |
| user.updatedAt | 2022-7-06T11:12:39.664Z     | String         | user.updatedAt              |
| user.__v       | 0                           | Number         |                             |

#### Example response

```
{
  "error_code": "0",
  "error_message": "Success",
  "user": {
    "gender": "male",
    "avatar": "/uploads/default_avatar.png",
    "following": [],
    "_id": "5f7c5127354939e9ce5465a2",
    "name": "***",

```



```

    "password": "cWusTDiC",
    "createdAt": "2022-7-06T11:12:39.664Z",
    "updatedAt": "2022-7-06T11:12:39.664Z",
    "__v": 0
  }
}

```

#### Field Description

| Parameter Name | Example values                                    | Parameter Type | Parameter Description |
|----------------|---------------------------------------------------|----------------|-----------------------|
| status         | 400001                                            | Number         | status                |
| message        | User name already exists,<br>please change a name | String         | message               |

#### Example response

```

{
  "status": 400001,
  "message": "User name already exists, please change a name"
}

```

### 3.1.7 Configure blockchain property files

Interface Status: Completed

Interface URL: <http://domain/open/bigchaindb/v1/configChainProperties>

Content-Type: application/json

Request Method: post

Header parameters and description

| Parameter Name | Example values                           | Parameter Type | Required or not | Parameter Description |
|----------------|------------------------------------------|----------------|-----------------|-----------------------|
| accessToken    | 2EGz4EpthaqTzY8X<br>oaiRQJmVSo0HQ8l<br>X | String         | Yes             |                       |
| expiredTime    | 7200                                     | Number         | Yes             |                       |

#### Field Description

| Parameter Name     | Example values                           | Parameter Type | Required or not | Parameter Description |
|--------------------|------------------------------------------|----------------|-----------------|-----------------------|
| accessToken        | 2EGz4EpthaqTzY8X<br>oaiRQJmVSo0HQ8l<br>X | String         | Yes             | accessToken           |
| number_of_nodes    | **                                       | String         | Yes             | number_of_nodes       |
| node_Relationships | sibling                                  | String         | Yes             | node_Relationships    |
| node_Name          | ***                                      | String         | Yes             | node_Name             |
| space_id           | PnUc1ccX4axDBM9<br>WrRgCXtdMdgFM9<br>wrz | String         | Yes             | space_id              |

Body parameters and description

```
{
  "accessToken" : "2EGz4EpthaqTzY8XoaiRQJmVSo0HQ8lX",
  "number_of_nodes" : "**",
  "node_Relationships" : "sibling",
  "node_Name" : "***",
  "space_id" : "PnUc1ccX4axDBM9WrRgCXtdMdgFM9wrz",
}
```

Field Description

| Parameter Name   | Example values                       | Parameter Type | Parameter Description |
|------------------|--------------------------------------|----------------|-----------------------|
| error_code       | 0                                    | String         | error_code            |
| error_message    | Success                              | String         | error_message         |
| space_id         | PnUc1ccX4axDBM9WrRgCXtd<br>MdgFM9wrz | String         | space_id              |
| result           |                                      | Object         | result                |
| result.node_Name | ***                                  | String         | result.node_Name      |
| result.updatedAt | 2022-7-06T11:12:39.664Z              | String         | result.updatedAt      |

Example response

```
{
```

```
"error_code" : "0",  
"error_message" : "Success",  
"space_id" : "PnUc1ccX4axDBM9WrRgCXtdMdgFM9wrz",  
"result": {  
    "node_Name" : "****",  
    "updatedAt": "2022-7-06T11:16:32.642Z",  
}  
}
```
